# Supplementary material for: Bacitracin-Engineered BSA/ICG Nanocomplex with Enhanced Photothermal and Photodynamic Antibacterial Activity
Source: PubMed Central journal article supplement — ACS Omega. 2022 Sep 16;7(38):33821–9. doi: 10.1021/acsomega.2c02470 (PMC9520541; doi:10.1021/acsomega.2c02470), 2022-09-16
Supplement: ao2c02470_si_001.pdf [file ao2c02470_si_001.pdf]

**Supporting Information**

**Bacitracin-engineered BSA/ICG nanocomplex with enhanced  
photothermal and photodynamic antibacterial activity**

Yueying Xu,<sup>a1</sup> Wenhong Zhou,<sup>a1</sup> Le Xiao,<sup>a1</sup> Qian Lan,<sup>a</sup> Mingen Li,<sup>a</sup> Yun Liu,<sup>a</sup> Lijun Song,<sup>a,\*</sup> and Li Li<sup>a,\*</sup>

<sup>a</sup> Guangdong Key Laboratory for Research and Development of Natural Drugs, School of Pharmacy, Guangdong Medical University, 524023, Zhanjiang, China

\*Correspondence: Email: songlijun6981@126.com (LS); china\_lovelylily@hotmail.com (LL);

<sup>1</sup>These authors contributed equally to this work.

Corresponding author.

E-mail address: songlijun6981@126.com

Corresponding author.

E-mail address: china\_lovelylily@hotmail.com

**Figure S1:** Particle size distribution of BSA@ICG, and stability of BSA@ICG@Bac in water and PBS 7.4

**Figure S2:** Drug loading of ICG in BSA@ICG@Bac

**Figure S3:** Effect of water on the UV-absorption spectrum of DPBF under 808 nm laser irradiation and the effect of BSA@ICG@Bac in dark

**Figure S4:** Absorption intensity under different conditions

**Figure S5:** Photothermal conversion efficiency of BSA@ICG@Bac

**Figure S6:** FTIR spectra of the raw materials forming BSA@ICG@Bac and BSA@ICG@Bac

**Figure S7:** Photothermal imaging of BSA@ICG@Bac at different concentrations

**Figure S8:** In vitro antimicrobial activity of BSA@ICG and BSA@ICG@Bac with or without 660 nm laser irradiation

**Figure S9:** Targeting of BSA@ICG and BSA@ICG@Bac by *S. aureus*

**Figure S10:** Fluorogram of intracellular production of reactive oxygen species by *S. aureus*

**Figure S11:** Photographs of *S. aureus* and *E. coli* biofilms

**Table S1:** MIC of BSA@ICG@Bac

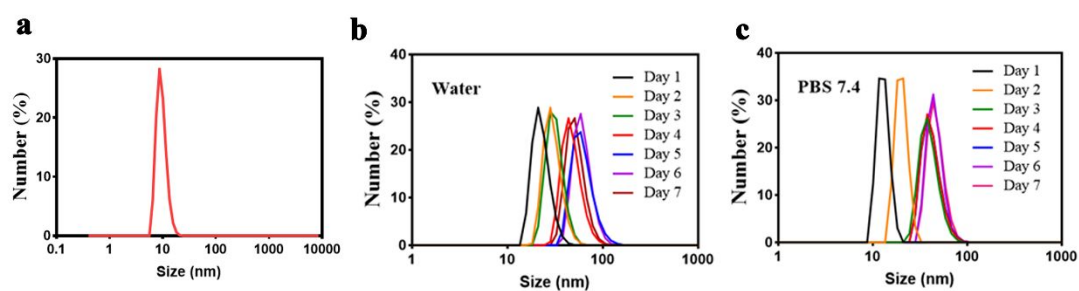

**Figure S1.** (a) BSA@ICG NPs measured by dynamic light scattering (DLS). Hydrodynamic diameters of BSA@ICG@Bac in (b) water and (c) PBS 7.4 during 7 days obtained by dynamic light scattering.

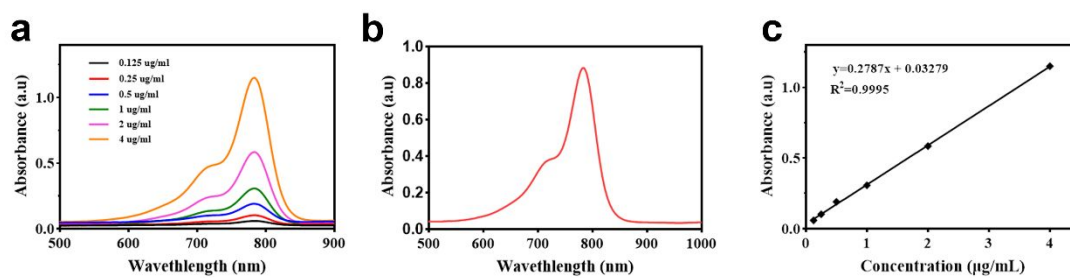

**Figure S2.** (a) UV-Vis spectra of ICG dispersion with different concentrations. (b) UV-Vis spectra of free ICG diluted 16 times. (c) liner fitting curve. According to equation the loading content is calculated to be 6.6 %, and the encapsulation efficiency is 80.5%.

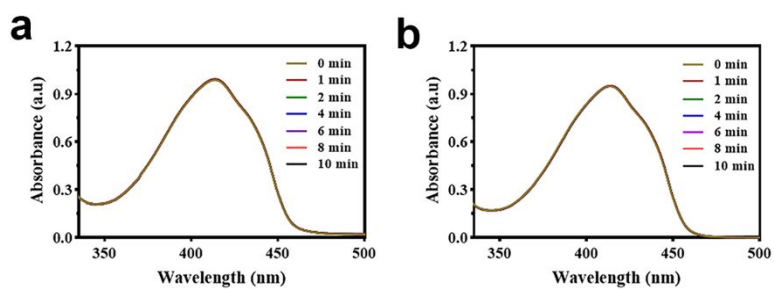

**Figure S3.** Spectrogram of UV absorption of DPBF with (a) H<sub>2</sub>O under 808 nm irradiation and (b) BSA@ICG@Bac without 808 nm irradiation.

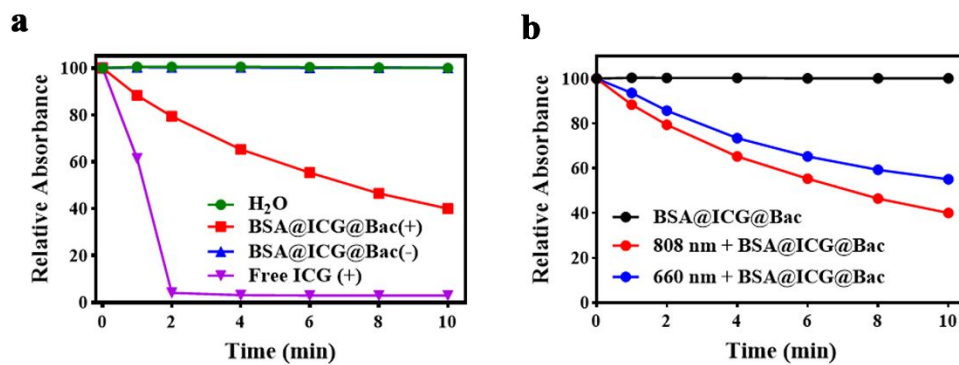

**Figure S4.** (a) Absorption strength of the different sample groups under 808 nm irradiation. (b) Absorption strength under different laser irradiation.

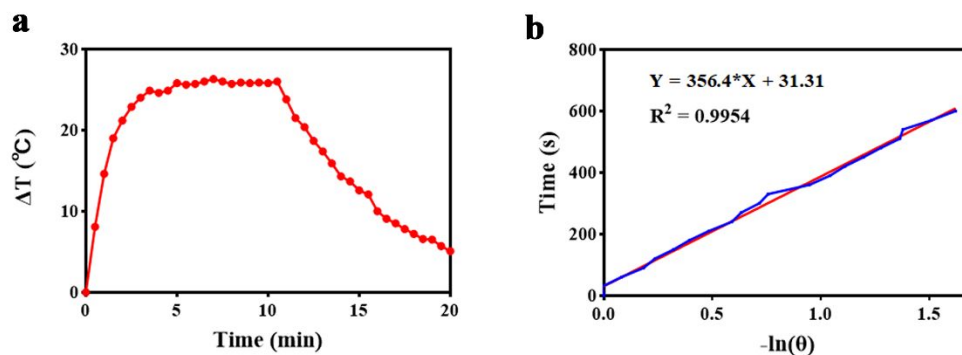

**Figure S5.** (a) Photothermal effect of aqueous dispersion of nanoparticles under irradiation with the NIR laser for one on/off cycle. (b) Time constant for heat transfer from the system. The value of photothermal conversion efficiency ( $\eta$ ) was calculated according the equation,  $\eta = \frac{hs(T_{max} - T_{max, water})}{I(1 - 10^{-A_{\lambda}})}$ . In this equation,  $hs$  was  $0.0118 \text{ J}/(\text{kg}\cdot\text{K}\cdot\text{s})$ , which was measured by fitting the cooling curve of BSA@ICG@Bac NPs solution. The maximum steady temperature ( $T_{max}$ ) was  $57 \text{ }^{\circ}\text{C}$  and the ambient environmental temperature ( $T_{max, water}$ ) was  $35.5 \text{ }^{\circ}\text{C}$ . The power density of laser ( $I$ ) was  $1 \text{ W}/\text{cm}^2$ . The absorbance of BSA@ICG@Bac NPs solution ( $A_{\lambda}$ ) was  $0.631$ , which was measured using quartz cell containing aqueous samples without BSA@ICG@Bac NPs. Thus, according to equation, the photothermal conversion efficiency ( $\eta$ ) of the BSA@ICG@Bac NPs at  $808 \text{ nm}$  is calculated to be  $33.07 \%$ .

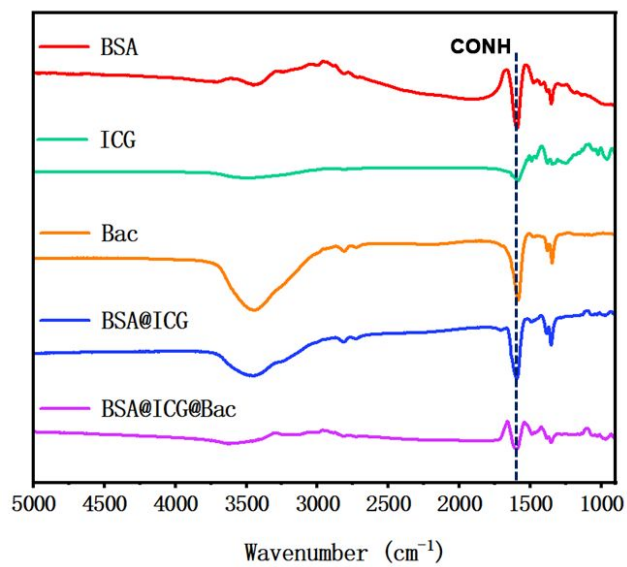

**Figure S6.** FT-IR spectra of BSA, ICG, Bacitracin (Bac), BSA@ICG and BSA@ICG@Bac NPs.

The vibration peaks at 1600 cm<sup>-1</sup> match with the CONH groups of BSA.



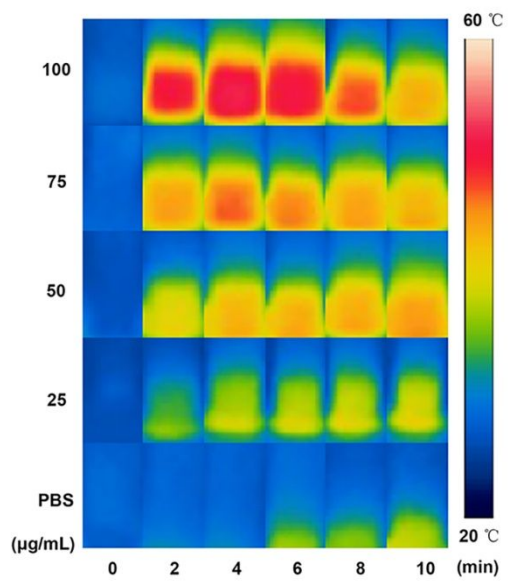

**Figure S7.** Photothermal heating diagram of BSA@ICG@Bac at different concentrations at 1 W /cm<sup>2</sup> under 808 nm irradiation.

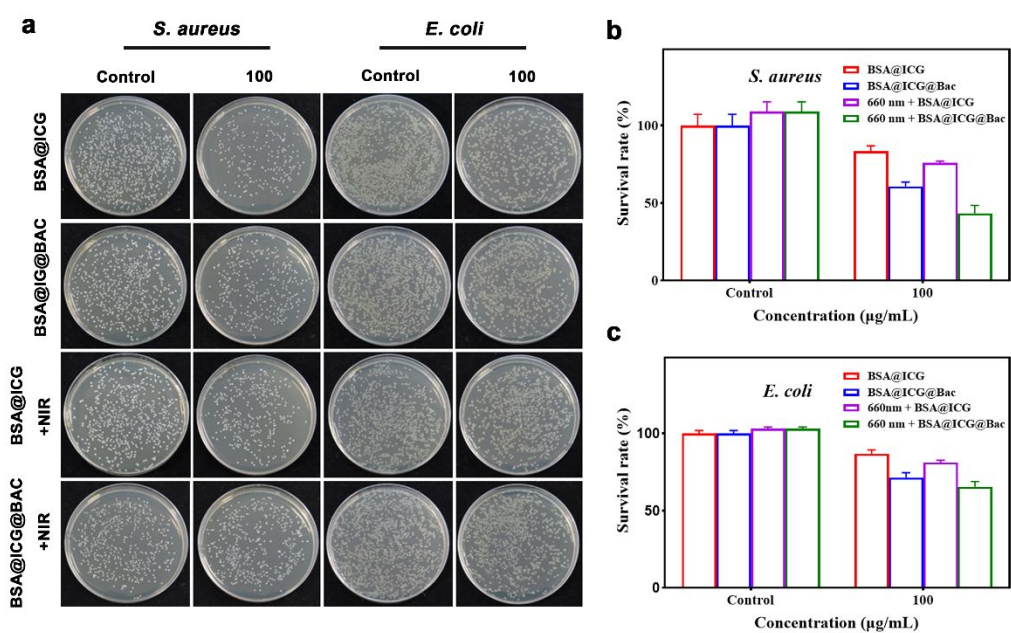

**Figure S8.** Photographs of bacterial colonies formed by (a) *S. aureus* and *E. coli* treated with different concentration of BSA@ICG and BSA@ICG@Bac with or without 660 nm irradiation at 1 W /cm<sup>2</sup>. The bacterial survival of (b) *S. aureus* and (c) *E. coli* after treatment determined by the plate counting method.

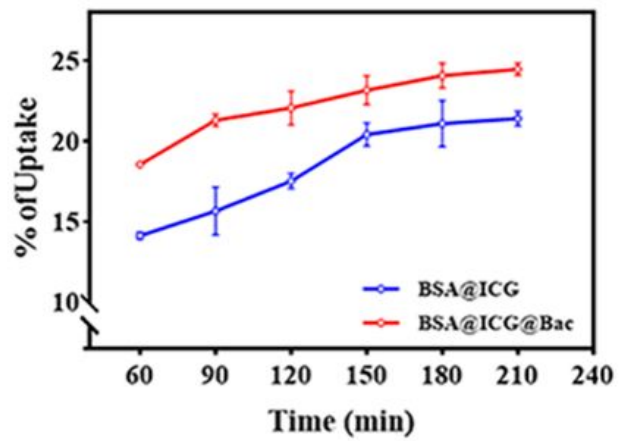

**Figure S9.** Uptake percentages of BSA@ICG and BSA@ICG@Bac by *S. aureus*.

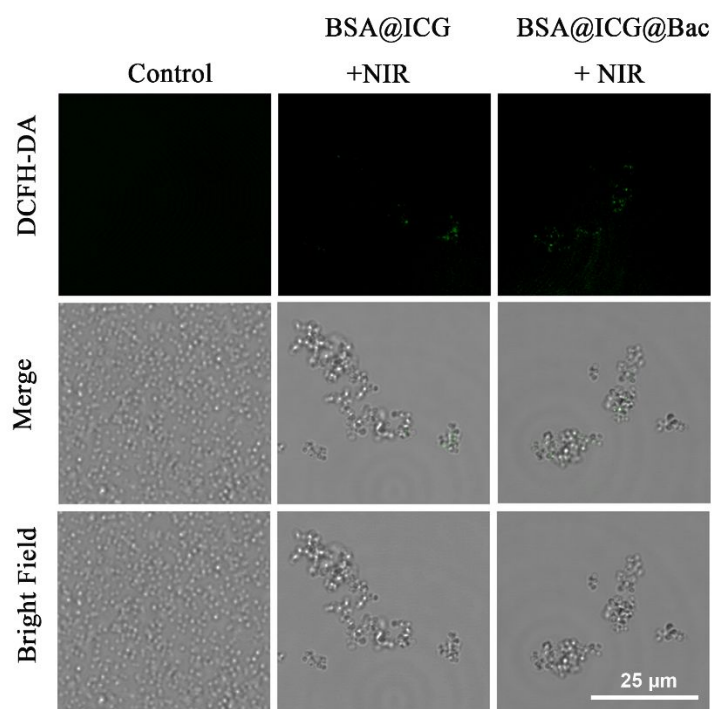

**Figure S10.** ROS production in *S. aureus* after being exposed to BSA@ICG and BSA@ICG@Bac NPs under 808 nm irradiation.

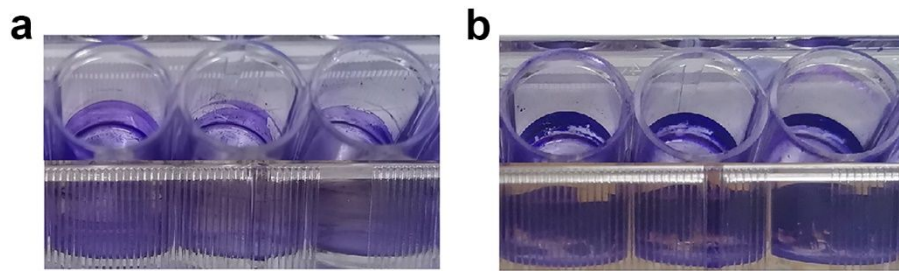

**Figure S11.** (a) *S. aureus* and (b) *E. coli* biofilms were stained by crystal violet.

**Table S1**Antimicrobial activity of BSA@ICG@Bac NPs as MIC ( $\mu\text{g/mL}$ ).

|                 | Bacteria         |                |
|-----------------|------------------|----------------|
|                 | <i>S. aureus</i> | <i>E. coli</i> |
| BSA@ICG@Bac (-) | R                | R              |
| BSA@ICG@Bac (+) | 100              | 100            |

R, resistant
